# Supplementary material for: The Repurposed Drugs Suramin and Quinacrine Cooperatively Inhibit SARS-CoV-2 3CLpro In Vitro
Source: Viruses. 2021 May 10;13(5):873. doi: 10.3390/v13050873 (PMC8170883; doi:10.3390/v13050873)
Supplement: Supplementary file 1 [file viruses-13-00873-s001.zip › viruses-1190244-supplementary.pdf]

## Supplementary Information

### The repurposed drugs Suramin and Quinacrine cooperatively inhibit SARS-CoV-2 3CL<sup>pro</sup> *in vitro*

Raphael J. Eberle<sup>1,2#\*</sup>, Danilo S. Olivier<sup>3</sup>, Marcos S. Amaral<sup>4</sup>, Ian Gering<sup>1</sup>, Dieter Willbold<sup>1,2,5</sup>, Raghuvir K. Arni<sup>6</sup>, Monika A. Coronado<sup>1,6#\*</sup>

<sup>1</sup>Institute of Biological Information Processing (IBI-7: Structural Biochemistry), Forschungszentrum Jülich, Jülich, Germany.

<sup>2</sup>Institut für Physikalische Biologie, Heinrich-Heine-Universität Düsseldorf, Universitätsstraße, Düsseldorf, Germany.

<sup>3</sup>Federal University of Tocantins, Araguaína-TO, Brazil.

<sup>4</sup>Institute of Physics, Federal University of Mato Grosso do Sul, Campo Grande-MS, Brazil.

<sup>5</sup>JuStruct: Jülich Centre for Structural Biology, Forschungszentrum Jülich, Jülich, Germany.

<sup>6</sup>Multiuser Center for Biomolecular Innovation, IBILCE, Universidade Estadual Paulista (UNESP), São Jose do Rio Preto-SP, Brazil.

#both authors contributed equally

\*Correspondence to eberleraphael@gmail.com or monikacoronado@gmail.com

#### Table of contents

Supplementary Figure S1. Purification of SARS-Cov-2 3CL<sup>pro</sup> and quality check of the produced protein.

Supplementary Figure S2. K<sub>M</sub> determination of SARS-CoV-2 3CL<sup>pro</sup>.

Supplementary Figure S3. Effect of Triton X-100 on the Quinacrine and Suramin inhibition against 3CL<sup>pro</sup>.

Supplementary Figure S4. H<sub>2</sub>O<sub>2</sub> generating capacity of Quinacrine and Suramin under the influence of 1mM TCEP.

Supplementary Figure S5. Quinacrine and Suramin with inhibitory activity against SARS-CoV-2 3CL<sup>pro</sup>.

Supplementary Figure S6. Fluorescence spectroscopy of Trp at 295 nm of SARS-CoV-2 3CL<sup>pro</sup> in the presence of the Suramin and Quinacrine.

Supplementary Figure S7. K<sub>D</sub> determination of Quinacrine binding to SARS-CoV-2 3CL<sup>pro</sup> using SPR.

Supplementary Figure S8. K<sub>D</sub> determination of Suramin binding to SARS-CoV-2 3CL<sup>pro</sup> using SPR.

Supplementary Figure S9. K<sub>D</sub> determination of Quinacrine binding to SARS-CoV-2 3CL<sup>pro</sup> under the influence of Suramin using SPR.

Supplementary Figure S10. Clustering analysis of the SARS-CoV-2 3CL<sup>pro</sup> structure after MD simulation.

Supplementary Figure S11. Time dependent modifications of the SARS-CoV-2 3CL<sup>pro</sup> dimer.

Supplementary Figure S12. SARS-CoV-2 3CL<sup>pro</sup> dimeric structure after MD simulation.

Supplementary Figure S13. Time dependent modifications of SARS-CoV-2 3CL<sup>pro</sup> dimer in the presence of Quinacrine in each active site.

Supplementary Figure S14. Time dependent modifications of SARS-CoV-2 3CL<sup>pro</sup> dimer in the presence of Suramin. Supplementary Figure S15. Atom numbers of Quinacrine and Suramin.

Supplementary Figure S16. Quinacrine and Suramin combination with inhibitory activity against SARS-CoV-2 3CL<sup>pro</sup>.

Supplementary Figure S17. Time dependent modifications of SARS-CoV-2 3CL<sup>pro</sup> dimer in the presence of Quinacrine and Suramin.

Table S1. K<sub>D</sub> values of Quinacrine and Suramin SARS-CoV-2 3CL<sup>pro</sup>, determined by SPR.

Table S2. Contributing amino acids in the substrate-binding sites of SARS-CoV-2 3CL<sup>pro</sup>.

Table S3. SARS-CoV-2 3CL<sup>pro</sup> Residues involved in forming H-bonds and hydrophobic contacts with Quinacrine, Suramin and Quinacrine + Suramin.

Table S4. Affected proteins by mutations in SARS-CoV-2 variants.

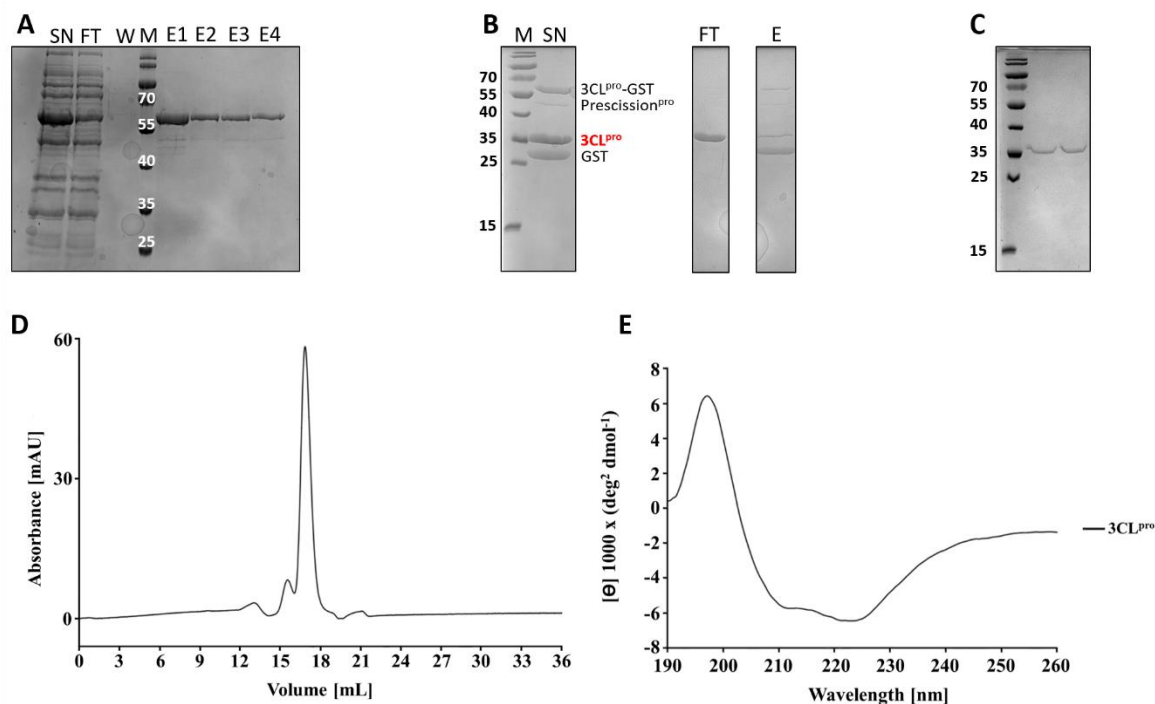

**Figure S1. Purification of SARS-Cov-2 3CL<sup>pro</sup> and quality check of the produced protein.** (A) SDS 15% Gel of 3CL<sup>pro</sup>-GST purification with GSH sepharose. SN: supernatant, FT: flow through, W: washing step, M: protein marker, E1-E4: Elution. (B) SDS 15% Gel of the 3CL<sup>pro</sup>-GST fusion protein cleavage by PreScission<sup>pro</sup>. M: protein marker. SN: cleaving approach, containing 3CL<sup>pro</sup>-GST, PreScission<sup>pro</sup>, 3CL<sup>pro</sup> and GST. FT: contain 3CL<sup>pro</sup>, E: elution contains uncleaved 3CL<sup>pro</sup>-GST, PreScission<sup>pro</sup> and GST. (C) SDS 15% Gel of 3CL<sup>pro</sup> after size exclusion chromatography. (D) 3CL<sup>pro</sup> Chromatogram after size exclusion chromatography. (E) CD spectrum of 3CL<sup>pro</sup>.

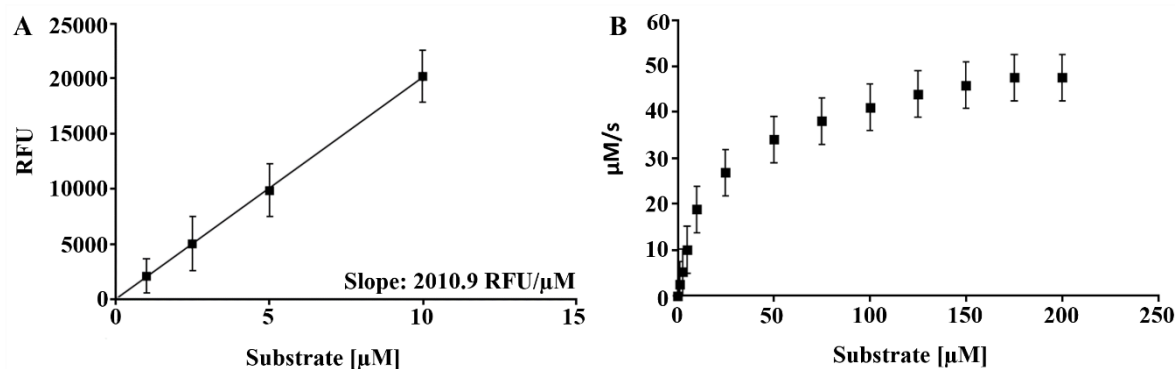

**Figure S2. K<sub>M</sub> determination of SARS-CoV-2 3CL<sup>pro</sup>.** (A) Standard curve to convert RFU to the amount of the cleaved substrate (μM). (B) Michaelis-Menten plot of 0.5 μM protein with various concentrations of FRET substrate. Curve fitting with Michaelis-Menten equation gave the best fitting values of K<sub>M</sub> and V<sub>max</sub> as 25.47 ± 3.43 μM and 47.52 ± 2.91 μM/s, respectively. Data shown are the mean ± SD from three independent measurements (n=3).

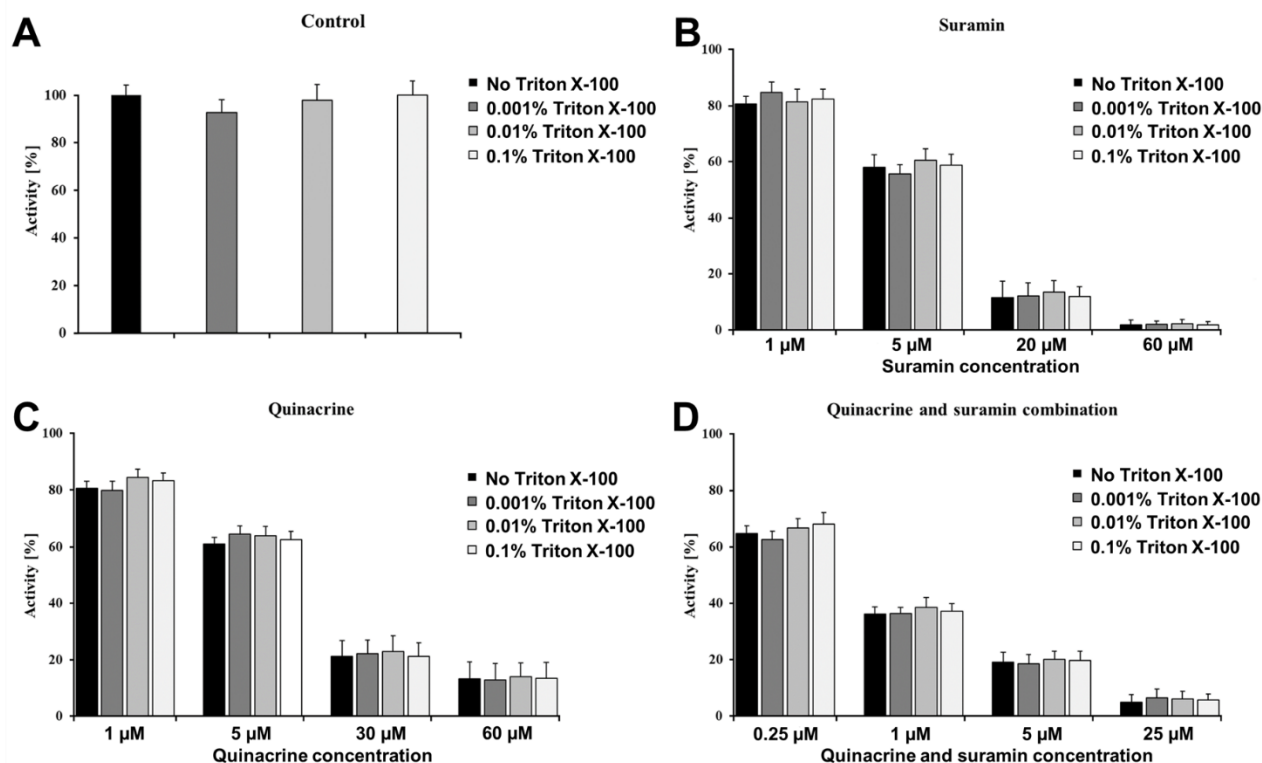

**Figure S3. Effect of Triton X-100 on the Quinacrine and Suramin inhibition against SARS-CoV-2 3CL<sup>pro</sup>.** The experiments were performed to exclude the possibility that the molecules inhibit the protease promiscuously by aggregation. Three Triton X-100 concentrations (0.001%, 0.01% and 0.1%) were tested with four different inhibitor concentrations and compared with the results without detergent. Additionally, the effect of Triton X-100 against the protease was tested. Data shown are the mean  $\pm$  SD from three independent measurements (n=3). **(A)** Effect of Triton X-100 on 3CL<sup>pro</sup> activity. **(B)** Effect of Triton X-100 on Suramin inhibition against 3CL<sup>pro</sup>. **(C)** Effect of Triton X-100 on Quinacrine inhibition against 3CL<sup>pro</sup>. **(D)** Effect of Triton X-100 on Quinacrine and Suramin (combination) inhibition against 3CL<sup>pro</sup>.

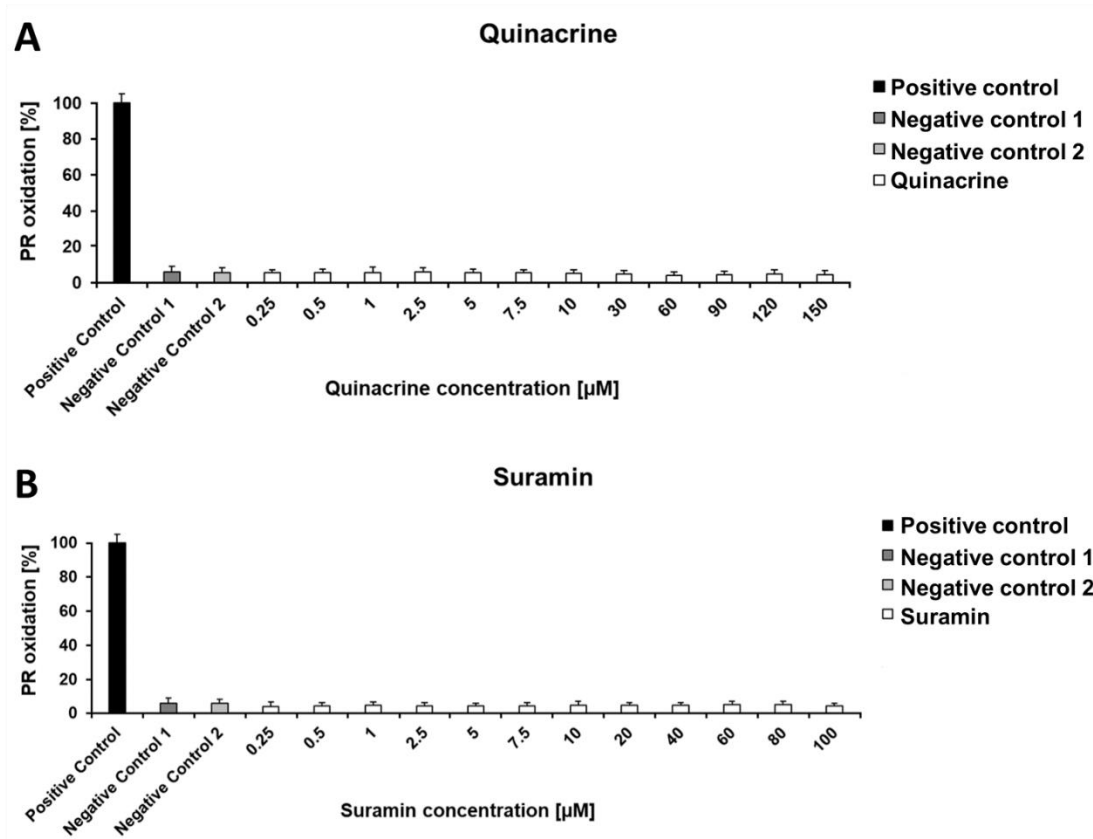

**Figure S4.  $\text{H}_2\text{O}_2$  generating capacity of Quinacrine and Suramin under the influence of 1mM TCEP.** The experiments were performed to measure the  $\text{H}_2\text{O}_2$  generating capacity of Quinacrine and Suramin under the influence of 1mM TCEP. Further, the  $\text{H}_2\text{O}_2$ -dependent horseradish peroxidase (HRP) mediates the oxidation of phenol red (PR), which can be followed at 610 nm. Positive control: HRP-PR and  $\text{H}_2\text{O}_2$ ; negative control 1: HRP-PR; negative control 2: PR; Data showed are the mean  $\pm$  SD from three independent measurements ( $n=3$ ). **(A)**  $\text{H}_2\text{O}_2$  generation by Quinacrine. **(B)**  $\text{H}_2\text{O}_2$  generation by Suramin.

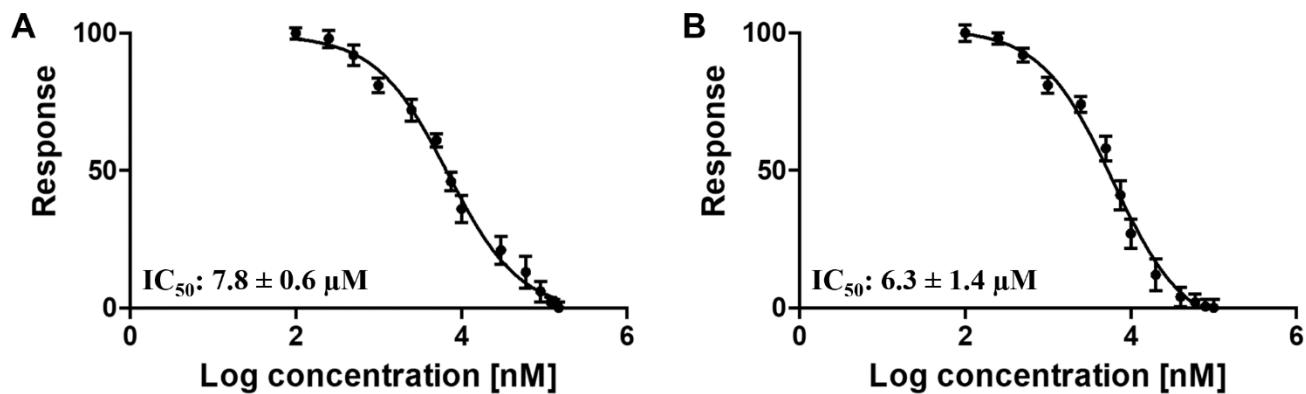

**Figure S5. Quinacrine and Suramin with inhibitory activity against SARS-CoV-2 3CL<sup>pro</sup>.** Dose response curves for IC<sub>50</sub> determination. The normalized response [%] of SARS-CoV-2 3CL<sup>pro</sup> is plotted against the Log of the Quinacrine and Suramin concentration. The determined IC<sub>50</sub> values are presented within the corresponding picture. (A) Dose response curve of Quinacrine and SARS-CoV-2 3CL<sup>pro</sup>. (B) Dose response curve of Suramin and SARS-CoV-2 3CL<sup>pro</sup>. Data shown are the mean  $\pm$  SD from three independent measurements (n=3).

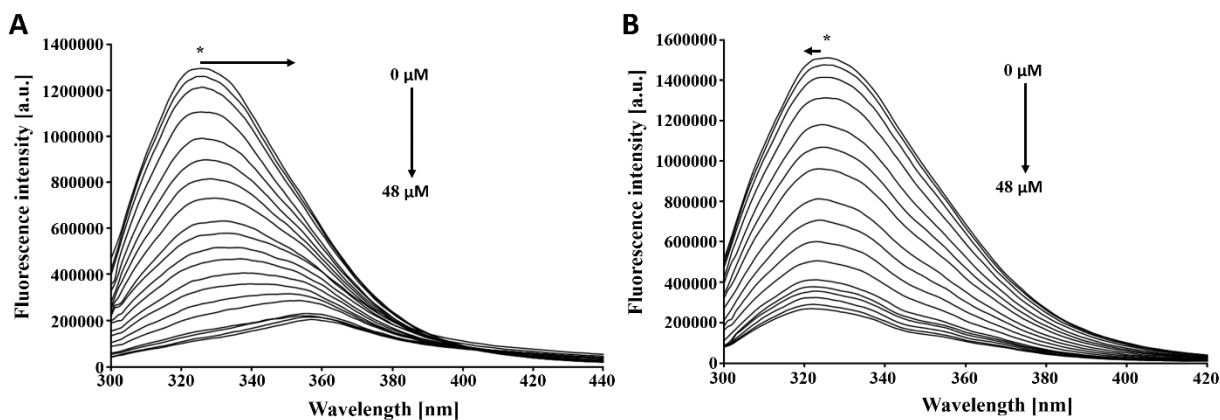

**Figure S6. Fluorescence spectroscopy of Trp at 295 nm of SARS-CoV-2 3CL<sup>pro</sup> in the presence of the Suramin and Quinacrine.** (A) Fluorescence of SARS-CoV-2 3CL<sup>pro</sup> under influence of Suramin titration demonstrated a red excitation shift of visible Trp (B) Fluorescence of SARS-CoV-2 3CL<sup>pro</sup> under influence of Quinacrine titration demonstrated a blue excitation shift of visible Trp (\*).

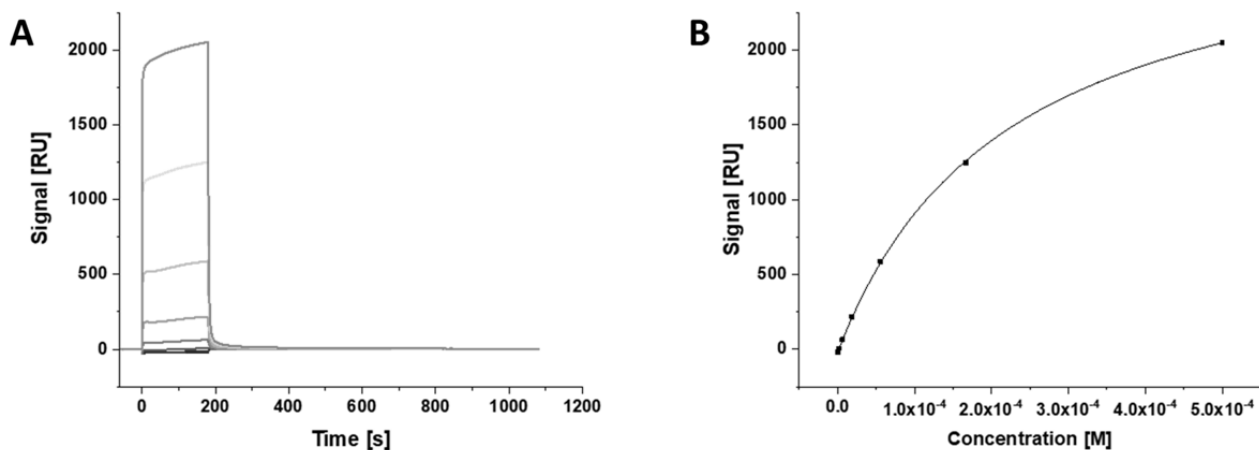

**Figure S7. Equilibrium dissociation constant ( $K_D$ ) determination of Quinacrine binding to SARS-CoV-2 3CL<sup>pro</sup> using surface plasmon resonance (SPR). (A) SPR sensorgram of 3CL<sup>pro</sup> and Quinacrine. (B) Saturation curve for the Quinacrine and 3CL<sup>pro</sup> interaction.**

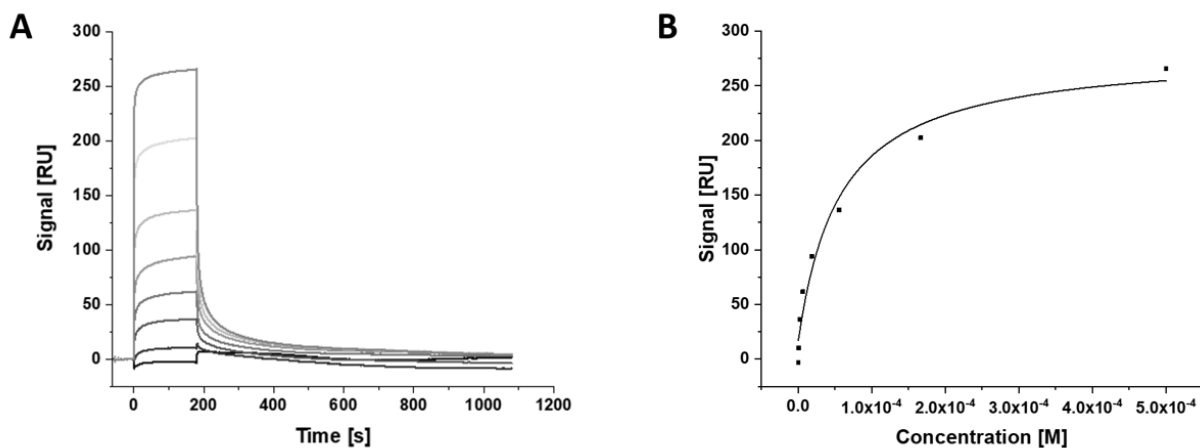

**Figure S8. Equilibrium dissociation constant ( $K_D$ ) determination of Suramin binding to SARS-CoV-2 3CL<sup>pro</sup> using surface plasmon resonance (SPR). (A) SPR sensorgram of 3CL<sup>pro</sup> and Suramin. (B) Saturation curve for the Suramin and 3CL<sup>pro</sup> interaction.**

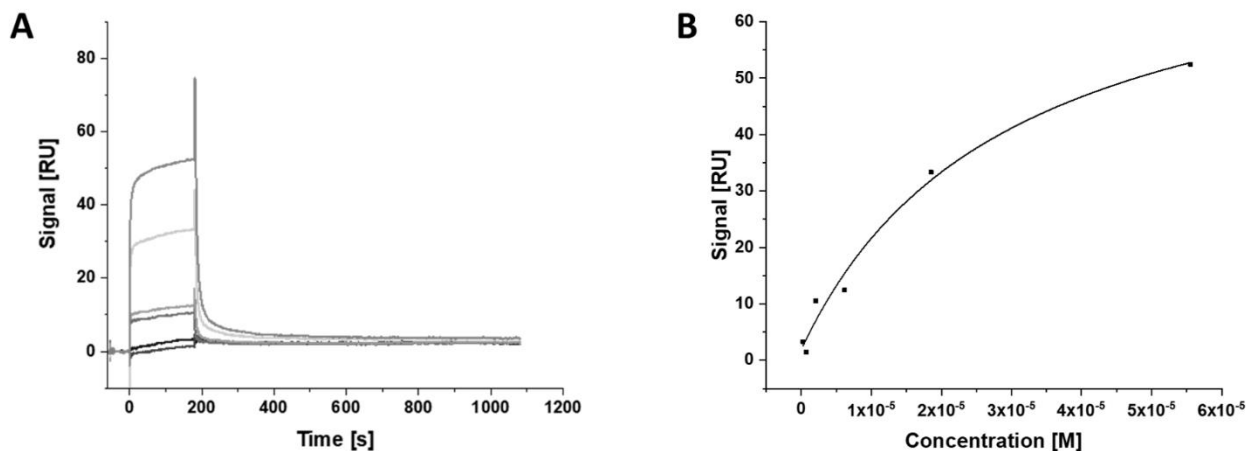

**Figure S9. Equilibrium dissociation constant ( $K_D$ ) determination of Quinacrine binding to SARS-CoV-2 3CL<sup>pro</sup> under Suramin influence using surface plasmon resonance (SPR). (A) SPR sensorgram of 3CL<sup>pro</sup> and Quinacrine under influence of Suramin. (B) Saturation curve for the Quinacrine and 3CL<sup>pro</sup> interaction.**

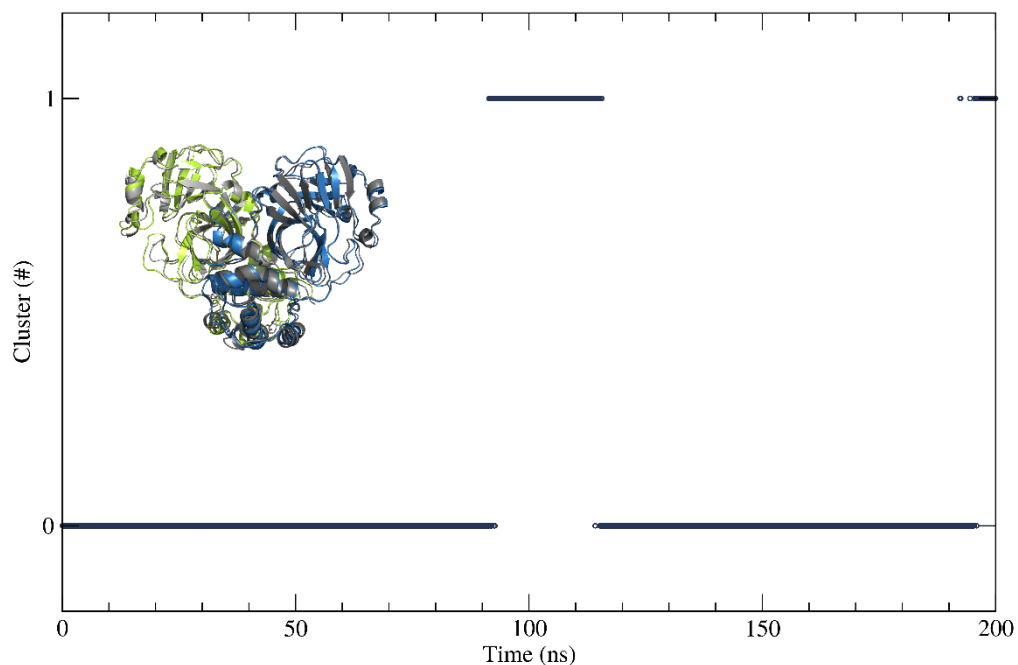

**Figure S10. Clustering analysis of the SARS-CoV-2 3CL<sup>pro</sup> structure after MD simulation.** Pure protein pointed to a chosen structure (cluster 0) that was representative for over 86,1% of the simulation and appeared around 169 ns. The representative structure (C0) is in green and blue, while the (C1) is colored in grey.

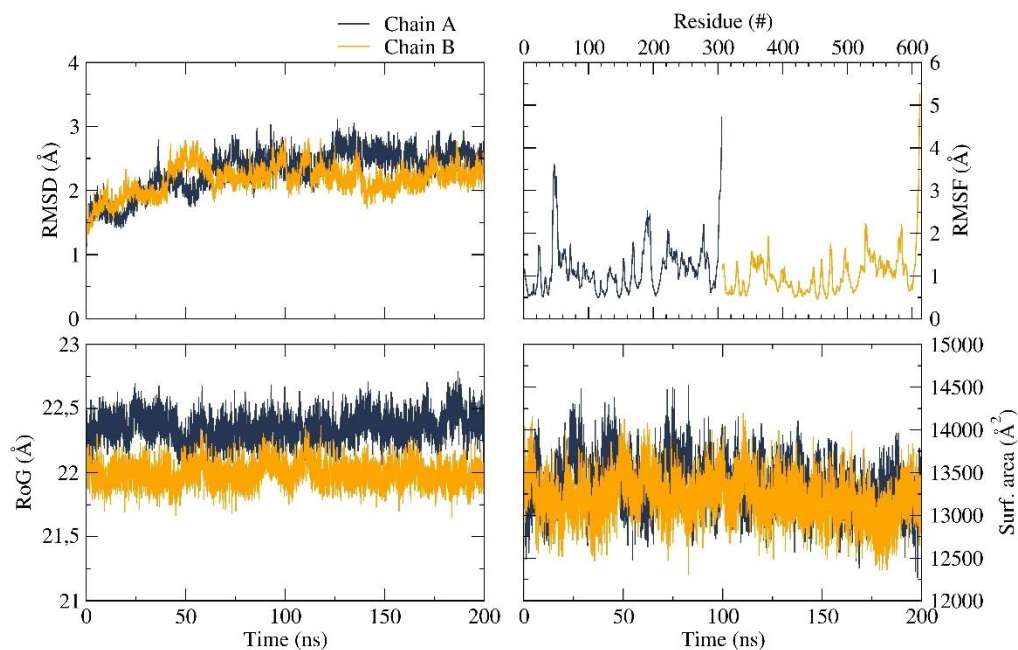

**Figure S11. Time dependent modifications of the SARS-CoV-2 3CL<sup>pro</sup> dimer.** Protomer 1 (blue) and protomer 2 (yellow). RMSD, RoG and surface area as function of time. RMSF for each amino acid.

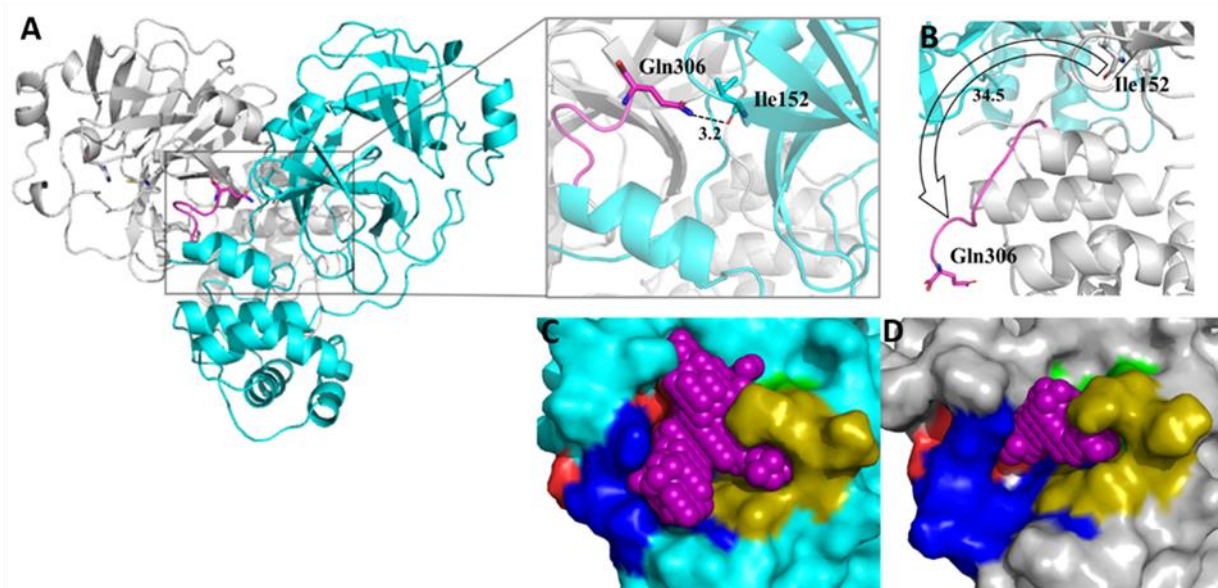

**Figure S12. SARS-CoV-2 3CL<sup>PRO</sup> dimeric structure after MD simulation.** (A) SARS-CoV-2 3CL<sup>PRO</sup> in ribbon view, protomer 1 in turquoise and protomer 2 in grey. H-bond between C-terminus Gln306 and Ile152 in protomer 1 is highlighted. (B) Protomer 2 Gln306 and Ile152 develop no H-bond. (C) Protomer 1 active site pocket volume yields around 261 Å<sup>3</sup>, the substrate binding subsites are highlighted. Green S1'; gold S1; red S2 and blue S3. (D) Protomer 2 active site volume yields about 142 Å<sup>3</sup>.

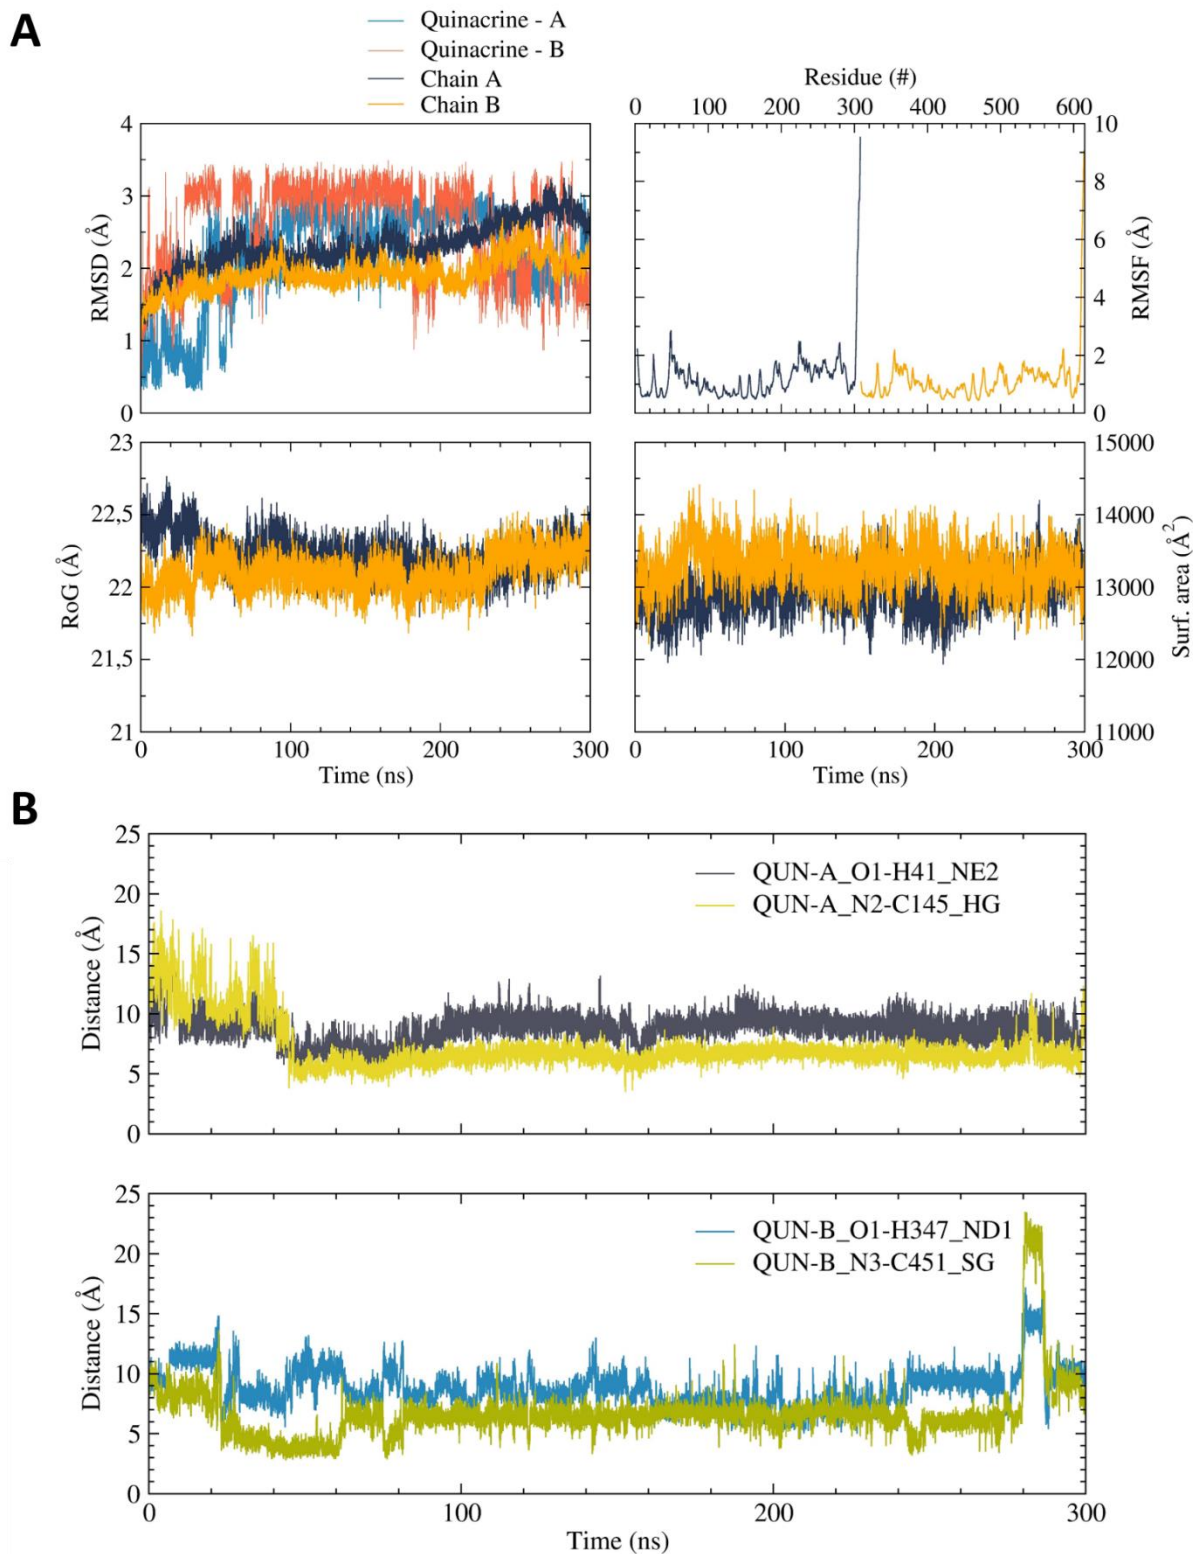

**Figure S13. Time dependent modifications of SARS-CoV-2 3CL<sup>pro</sup> dimer in the presence of Quinacrine in each active site. (A)** Protomer 1 (blue), Quinacrine A (light blue), protomer 2 (yellow) and Quinacrine B (pink). RMSD, RoG and surface area as function of time. RMSF for each amino acid. **(B)** Distance over time of Quinacrine A and B in the protease active site.

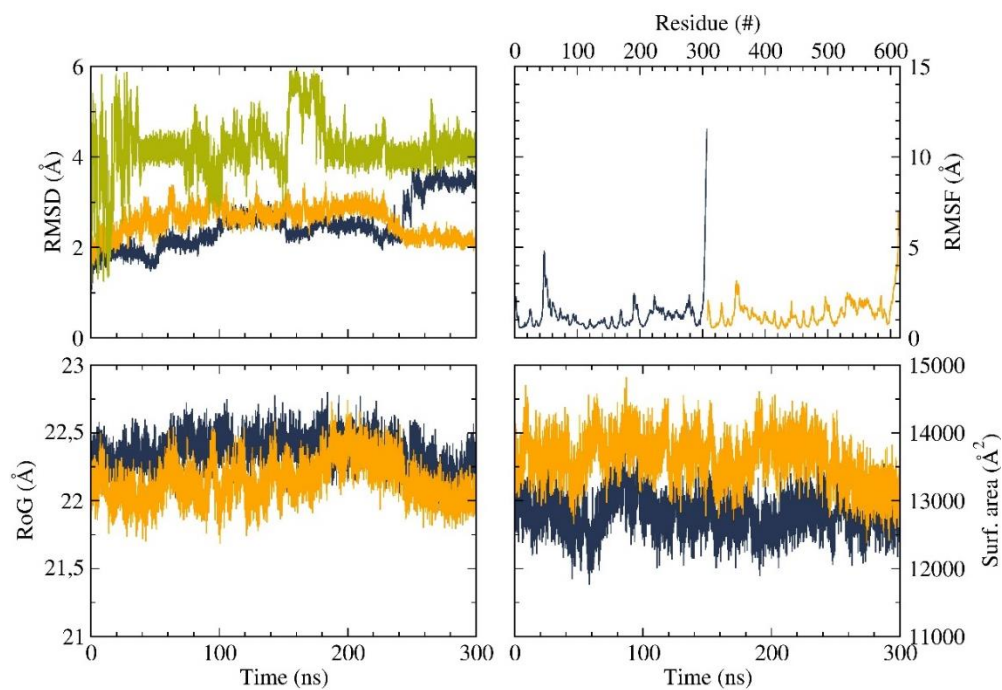

**Figure S14.** Time dependent modifications of SARS-CoV-2 3CL<sup>pro</sup> dimer in the presence of Suramin. Protomer 1 (blue), protomer 2 (yellow) and Suramin (green). RMSD, RoG and surface area as function of time. RMSF for each amino acid.

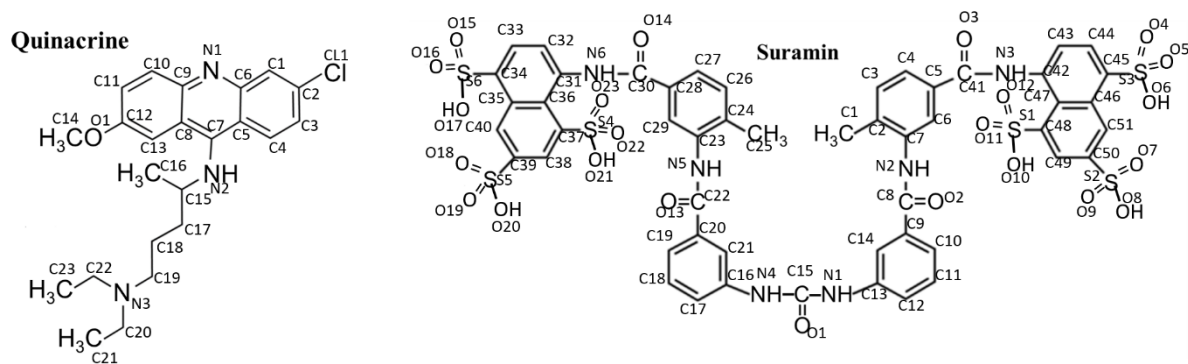

**Figure S15.** Atom numbers of Quinacrine and Suramin.

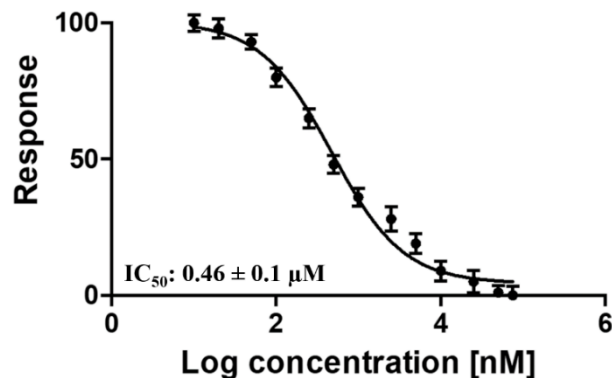

**Figure S16. Quinacrine and Suramin combination with inhibitory activity against SARS-CoV-2 3CL<sup>pro</sup>.** Dose response curve for IC<sub>50</sub> determination. The normalized response [%] of SARS-CoV-2 3CL<sup>pro</sup> is plotted against the Log of the combined Quinacrine and Suramin concentration. The determined IC<sub>50</sub> value is presented within the figure. Data shown are the mean  $\pm$  SD from three independent measurements (n=3).

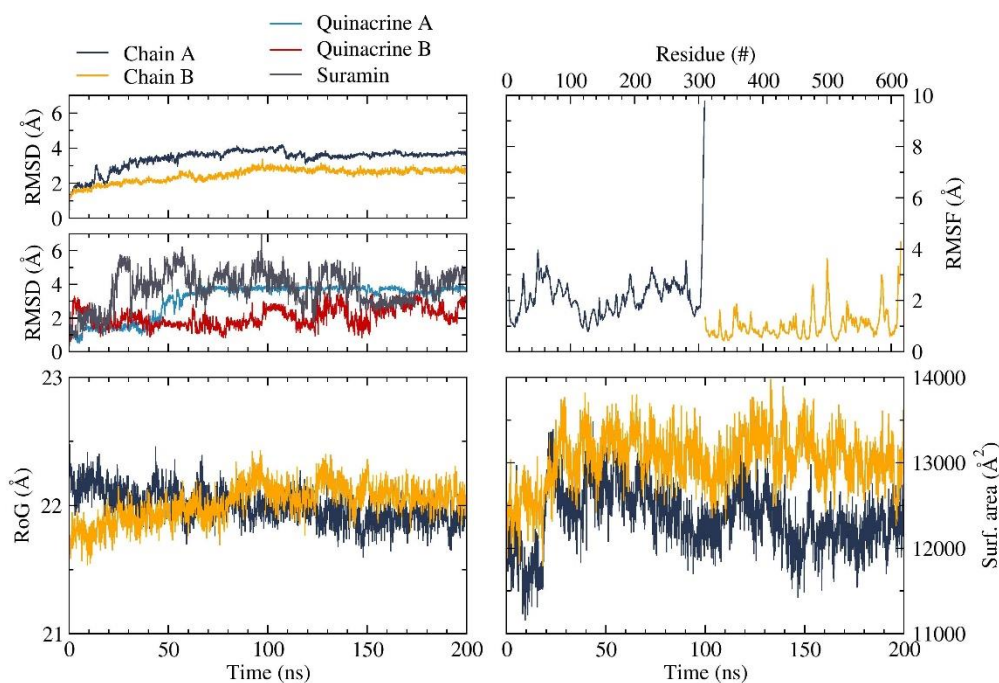

**Figure S17. Time dependent modifications of SARS-CoV-2 3CL<sup>pro</sup> dimer in the presence of Quinacrine and Suramin.** Protomer 1 (blue), protomer 2 (yellow), Suramin (gray), Quinacrine A (light-blue), Quinacrine B (red). RMSD, RoG and surface area as function of time. RMSF for each amino acid.

**Table S1.**  $K_D$  values of Quinacrine and Suramin SARS-CoV-2 3CL<sup>pro</sup>, determined by SPR.

| Molecule           | Experiment 1 $K_D$ [ $\mu$ M] | Experiment 2 $K_D$ [ $\mu$ M] | Experiment 3 $K_D$ [ $\mu$ M] | Average $K_D$ [ $\mu$ M] | STD [ $\mu$ M] |
|--------------------|-------------------------------|-------------------------------|-------------------------------|--------------------------|----------------|
| <b>Quinacrine</b>  | 233.5                         | 222.3                         | -                             | 227.9                    | $\pm 7.9$      |
| <b>Suramin</b>     | 62.9                          | 56.5                          | -                             | 59.7                     | $\pm 4.5$      |
| <b>Quinacrine*</b> | 15.05                         | 45.9                          | 29.6                          | 30.2                     | $\pm 12.7$     |

\* $K_D$  determination of Quinacrine to SARS-CoV-2 3CL<sup>pro</sup> in the presence of Suramin.

**Table S2.** Contributing amino acids in the Substrate-binding site of SARS-CoV-2 3CL<sup>pro</sup>.

| Substrate subsite*   | SARS-CoV-2 3CL <sup>pro</sup> |
|----------------------|-------------------------------|
| <b>S1'</b>           | <u>His41</u>                  |
|                      | Gly143                        |
|                      | Ser144                        |
|                      | <u>Cys145</u>                 |
| <b>S1</b>            | Phe140                        |
|                      | Leu141                        |
|                      | Asn142                        |
|                      | His163                        |
|                      | Glu166                        |
| <b>S2</b>            | <u>His41</u>                  |
|                      | Met49                         |
|                      | Tyr54                         |
|                      | His164                        |
|                      | Asp187                        |
|                      | Arg188                        |
| <b>S3</b>            | Met165                        |
|                      | Glu166                        |
|                      | Leu167                        |
|                      | Gln189                        |
|                      | Thr190                        |
|                      | Gln192                        |
| <b>Oxyanion hole</b> | <u>His41</u>                  |
|                      | <u>Cys145</u>                 |

\* Based on Tang et al. 2020 [1]

**Table S3.** SARS-CoV-2 3CL<sup>pro</sup> Residues involved in forming H-bonds and hydrophobic contacts with Quinacrine, Suramin and Quinacrine + Suramin.

| Ligand                       | Interacting residues                 |                                               |
|------------------------------|--------------------------------------|-----------------------------------------------|
|                              | <i>H-Bond</i>                        | <i>Hydrophobic interaction</i>                |
| <b>Quinacrine</b>            | Met165, Gln189                       | His41, Met49, Val186, Asp187, Arg188, Gln194  |
| <b>Suramin</b>               | Lys12, Lys97, Lys100, Tyr101, Phe103 | Lys97, Lys100, Lys102, Phe103, Val104, Arg105 |
| <b>Quinacrine (+Suramin)</b> | Thr45                                | Thr25, His41, Cys44, Thr45, Met49, Pro52      |
| <b>Suramin (+Quinacrine)</b> | Lys12, Thr98, Lys97                  | Pro96, Lys97, Thr98, Tyr 101                  |

**Table S4.** Affected proteins by mutations in SARS-CoV-2 variants.

| Variant                      | Origin       | Orf1ab                                                             | Orf3  | Orf8                | S <sup>1</sup>                                                                       | E <sup>2</sup> | M <sup>3</sup> | N <sup>4</sup> | D <sup>5</sup>                |
|------------------------------|--------------|--------------------------------------------------------------------|-------|---------------------|--------------------------------------------------------------------------------------|----------------|----------------|----------------|-------------------------------|
| <b>B.1.1.7</b>               | UK           | T1001I<br>A1708D<br>I2230T                                         |       | Q27<br>Y73C<br>R52I | N501Y<br>A570D<br>P681H<br>T716I<br>S982A<br>D1118H                                  |                |                | D3L<br>S235F   | 11288:9<br>21765:6<br>21991:3 |
| <b>B.1.351</b>               | South Africa | K1655N                                                             |       |                     | D80A<br>D215G<br>K417N<br>E484K<br>N501Y<br>A701V                                    | P71L           |                | T205I          |                               |
| <b>P.1</b>                   | Brazil       | S1188L<br>K1795Q                                                   | G174C | E92K                | L18F<br>T20N<br>P26S<br>D138Y<br>R190S<br>K417T<br>E484K<br>N501Y<br>H655Y<br>T1027I |                |                | P80R           | 11288:9                       |
| <b>A.23.1</b>                | Uganda       |                                                                    |       |                     | F157L<br>V367F<br>Q613H<br>P681R                                                     |                |                |                |                               |
| <b>B.1.525</b>               | UK, Nigeria  | L4715F                                                             |       |                     | E484K<br>Q52R<br>Q677H<br>F888L                                                      | L21F<br>I82T   |                |                | 11288:9<br>21765:6<br>28278:3 |
| <b>B.1.526<sup>[2]</sup></b> | USA          | T226I<br>P861L<br>Q876H<br>L3202P<br>T3953I<br>P4716L<br>Q5413H    |       |                     | L5F<br>T95I<br>D253G<br>E484K<br>D614G<br>A701V                                      |                |                | P199L<br>M234I |                               |
| <b>B.1.617<sup>[3]</sup></b> | India        | T1567I<br>T3646A<br>P4716L<br>G5530C<br>M5753I<br>K6711R<br>S6713A |       |                     | T95I<br>G142D<br>E154K<br>L452R<br>E484Q<br>D614G<br>P681R<br>Q1071H                 |                | I82S           | R203M<br>D377Y |                               |

<sup>1</sup> Spike glykoprotein<sup>2</sup> Envelope protein<sup>3</sup> Membrane<sup>4</sup> N-terminus<sup>5</sup> Deletion<sup>[2]</sup> Based on West et al. 2021<sup>[3]</sup> Based on Yadav et al. 2021

## References

- [1] Tang, B.; He, F.; Liu, D.; Fang, M.; Wu, Z.; Xu, D. AI-aided design of novel targeted covalent inhibitors against SARS-CoV-2. *bioRxiv*. **2020**.
- [2] West Jr, A.P.; Barnes, C.O.; Yang, Z.; Bjorkman, P.J. SARS-CoV-2 lineage B. 1.526 emerging in the New York region detected by software utility created to query the spike mutational landscape. *bioRxiv*. **2021**.
- [3] Yadav, P.D.; Sapkal, G.N.; Abraham, P.; Ella, R.; Deshpande, G.; Patil, D.Y.; Nyayanit, D.A.; Gupta, N.; Sahay, R.R.; Shete, A.M.; Panda, S.; Bhargava, B.; Mohan, V.K. Neutralization of variant under investigation B. 1.617 with sera of BBV152 vaccinees. *bioRxiv*. **2021**.
